# Supplementary material for: Jones oxidation of glycerol catalysed by small gold clusters
Source: Royal Society of Chemistry journal article supplement (doi:10.1039/c6cp07941e), 2017-01-01
Supplement: c6cp07941e1.pdf [file c6cp07941e1.pdf]

# Supplementary Information for:

## Jones Oxidation of Glycerol Catalysed by Small Gold Clusters

Anthony M. Pembere, Zhixun Luo\*

State Key Laboratory for Structural Chemistry of Unstable and Stable Species, Institute of Chemistry,  
Chinese Academy of Sciences, Beijing 100190, China.  
Email: [zxluo@iccas.ac.cn](mailto:zxluo@iccas.ac.cn)

### ✧ Experimental details.

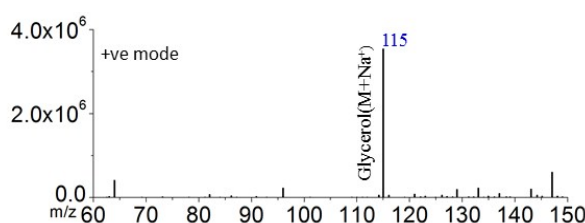

**Figure S1.** ESI-MS spectra (positive mode) of glycerol after laser ablation without gold rod, (concentrated with rotary evaporation) and at the addition of 0.15 ml volume of H<sub>2</sub>O<sub>2</sub> (30%) and 20 mg NaOH (1M).

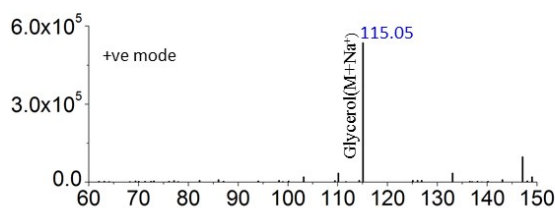

**Figure S2.** ESI-MS spectra of glycerol after reaction with 0.15 ml volume of H<sub>2</sub>O<sub>2</sub> (30%) and 20 mg NaOH (1M), (without laser ablation).

## ✧ Calculation details

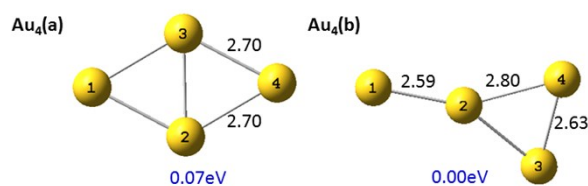

**Figure S3.** Structures of most stable isomers of Au<sub>4</sub>. Inter-atomic distances are given in angstroms.

**Table S1.** HOMO-LUMO orbitals in Au<sub>4</sub>

| NAO | Atom | No. | Lang | Type(AO) | Occupancy |
|-----|------|-----|------|----------|-----------|
| 38  | Au   | 2   | dxz  | Ryd(6d)  | 0.00007   |
| 39  | Au   | 2   | dyz  | val(5d)  | 1.91151   |

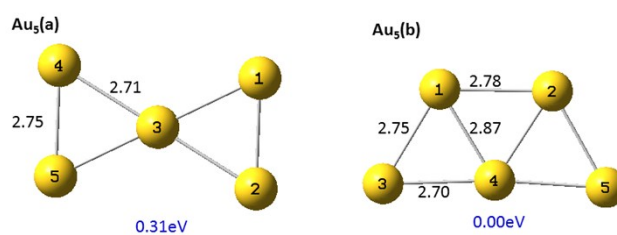

**Figure S4.** Structures of the most stable isomers of Au<sub>5</sub>. Inter-atomic distances are given in angstroms.

**Table S2.** HOMO-LUMO orbitals in Au<sub>5</sub>

| NAO | Atom | No. | Lang | Type(AO) | Occupancy |
|-----|------|-----|------|----------|-----------|
| 47  | Au   | 3   | S    | Ryd(7s)  | 0.00079   |
| 48  | Au   | 3   | Px   | Cor(5p)  | 1.99947   |

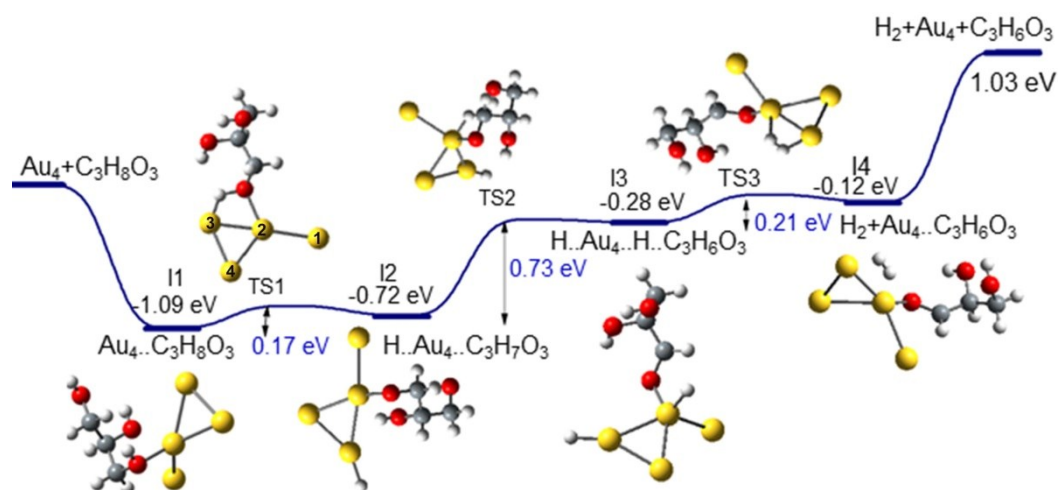

**Figure S5.** Alternative reaction coordinate of “glycerol+Au<sub>4</sub>” involving elimination of two hydrogen atoms on glycerol over Au<sub>4</sub> to form glyceraldehyde. H atom from the -OH group of the terminal carbon atom adsorbs onto No.3 Au atom site. Atoms in yellow, red, grey and white colour represent Au, O, C and H respectively.

We have also compared with the reaction pathways for glycerol dehydration to form 3-hydroxypropionaldehyde, and followed by oxidation to produce glyceraldehyde, as shown in Figure S6. As results, the calculated activation energy for the initial dehydration step is 0.03 eV, allowing the middle carbon of 3- hydroxypropionaldehyde to be attached to the oxygen atom of Au<sub>4</sub>O\*. The following reaction step is the insertion of an oxygen atom into the C-H bond, showing an energy gain of 0.03 eV ( $E_{f-e}$ ), while desorption of glyceraldehyde from Au<sub>4</sub> has an activation energy,  $\Delta G$ , equaling to -1.18 eV.

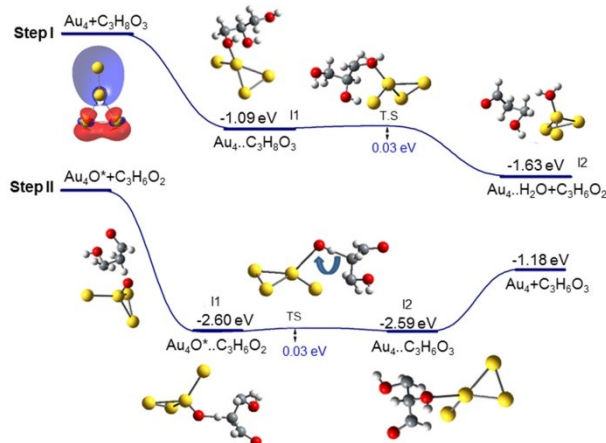

**Figure S6.** Reaction coordinates involving, step I: glycerol dehydration over Au<sub>4</sub> to 3-hydroxypropionaldehyde, step II: oxidation of 3-hydroxypropionaldehyde by Au<sub>4</sub>O\* to form glyceraldehyde. Atoms in yellow, red, grey and white colour represent Au, O, C and H respectively.

Considering that the reactivity in catalysis could change dramatically with the addition or removal of even a single atom, we have also investigated the interaction  $\text{H}_2\text{O}_2$  over  $\text{Au}_5$ .

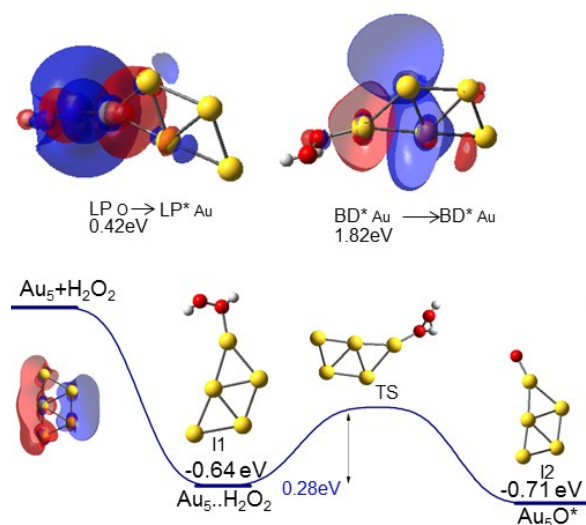

**Figure S7:** (Upper) SOP theory analysis of Fock matrix in NBO donor-acceptor (overlap) interactions in  $\text{Au}_5\text{-H}_2\text{O}_2$  complex, and (Below) the reaction coordinate of O-transfer from  $\text{H}_2\text{O}_2$  to  $\text{Au}_5$  to form  $\text{Au}_5\text{O}^*$ . Atoms in yellow, red, grey, and white colours represent Au, O, C and H respectively.

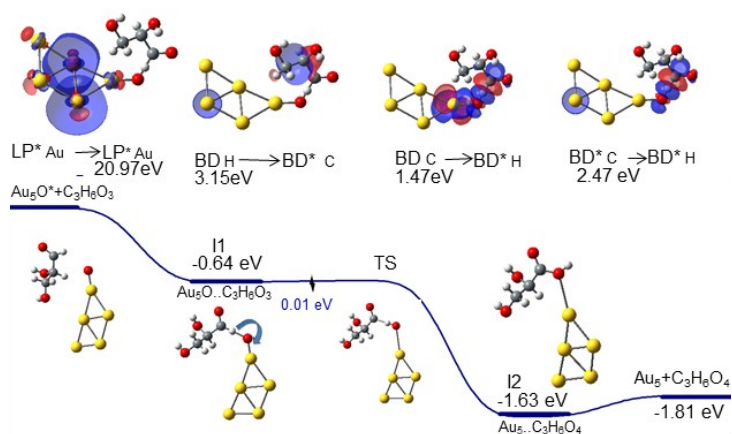

**Figure S8:** (Upper) Second-order-perturbation theory analysis of Fock matrix in NBO donor-acceptor (overlap) interactions in  $\text{Au}_5\text{O}^*\text{-glyceraldehyde}$  complex, and (below) the reaction coordinate involving oxidation of glyceraldehyde to glyceric acid over  $\text{Au}_5$ . Atoms in yellow, red, grey and white colours represent Au, O, C and H respectively.

**Table S3.** The Sum of electronic and zero point energies (a.u.) of gold clusters, reactants and products, calculated with different methods and basis sets.

|                               | HF/Lan12dz | B3lyp/ Lan12dz | B3lyp/6-31G |
|-------------------------------|------------|----------------|-------------|
| Au <sub>3</sub>               | -403.62673 | -406.41899     |             |
| Au <sub>4</sub>               | -538.19208 | -541.932       |             |
| Au <sub>5</sub>               | -672.75481 | -677.43267     |             |
| Au <sub>20</sub>              | -2691.2344 | -2710.0991     |             |
| Glycerol                      | -342.62875 | -344.63154     | -344.54804  |
| Glyceraldehyde                | -341.46472 | -343.4293      | -343.35138  |
| Glyceric acid                 | -416.2463  | -418.60322     | -418.57338  |
| Hydrogen                      | -1.113708  | -1.164262      | -1.165337   |
| H <sub>2</sub> O <sub>2</sub> | -150.71256 | -151.49989     | -151.44956  |
| Water                         | -75.988276 | -76.393557     | -76.365578  |

## Enlarged NBO patterns

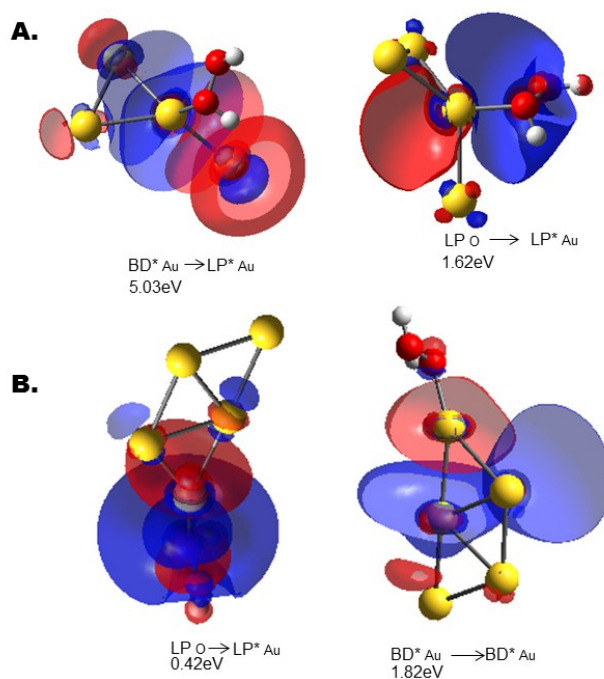

**Figure S9.** Enlarged NBO patterns. **A:** Second-order-perturbation (SOP) theory analysis of Fock matrix in NBO donor-acceptor (overlap) interactions in Au<sub>4</sub>-H<sub>2</sub>O<sub>2</sub> complex. **B:** SOP theory analysis of Fock matrix in NBO donor-acceptor (overlap) interactions in Au<sub>5</sub>-H<sub>2</sub>O<sub>2</sub> complex. Atoms in yellow, red, grey, and white colours represent Au, O, C and H respectively.

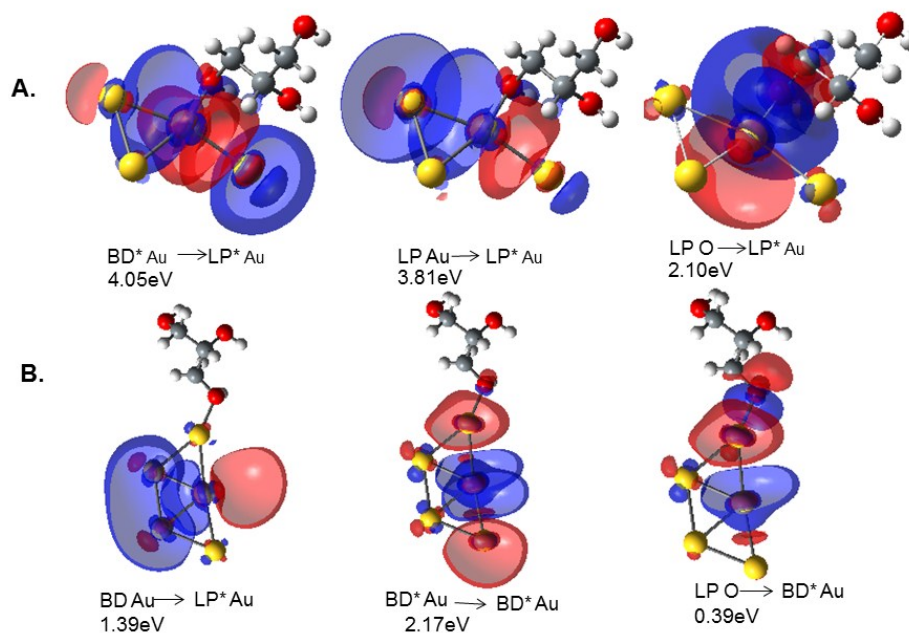

**Figure S10.** Enlarged NBO patterns. **A:** Second-order-perturbation theory analysis of Fock matrix in NBO donor–acceptor (overlap) interactions in Au<sub>4</sub>–glycerol complex **B:** Second-order-perturbation theory analysis of Fock matrix in NBO donor–acceptor (overlap) interactions in Au<sub>5</sub>–glycerol complex. Atoms in yellow, red, grey and white colours represent Au, O, C and H respectively.

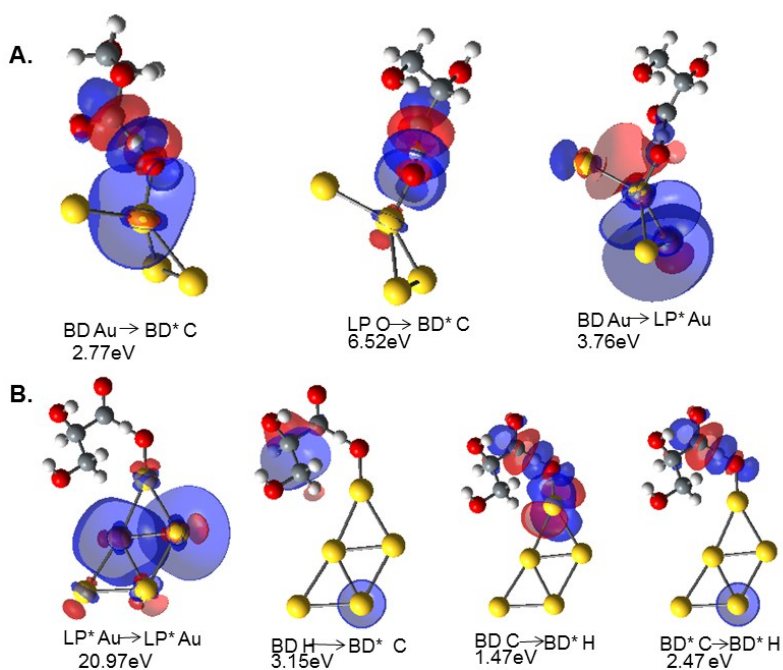

**Figure S11.** Enlarged NBO patterns. **A:** Second-order-perturbation theory analysis of Fock matrix in NBO donor–acceptor (overlap) interactions in Au<sub>4o\*</sub>–glyceraldehyde complex **B:** Second-order-perturbation theory analysis of Fock matrix in NBO donor–acceptor (overlap) interactions in Au<sub>5o\*</sub>–glyceraldehyde complex. Atoms in yellow, red, grey and white colours represent Au, O, C and H respectively.
